# Supplementary material
Source: PubMed Central journal article supplement (PMC3252482)
Supplement: NIHMS320009-supplement-01.pdf [file NIHMS320009-supplement-01.pdf]

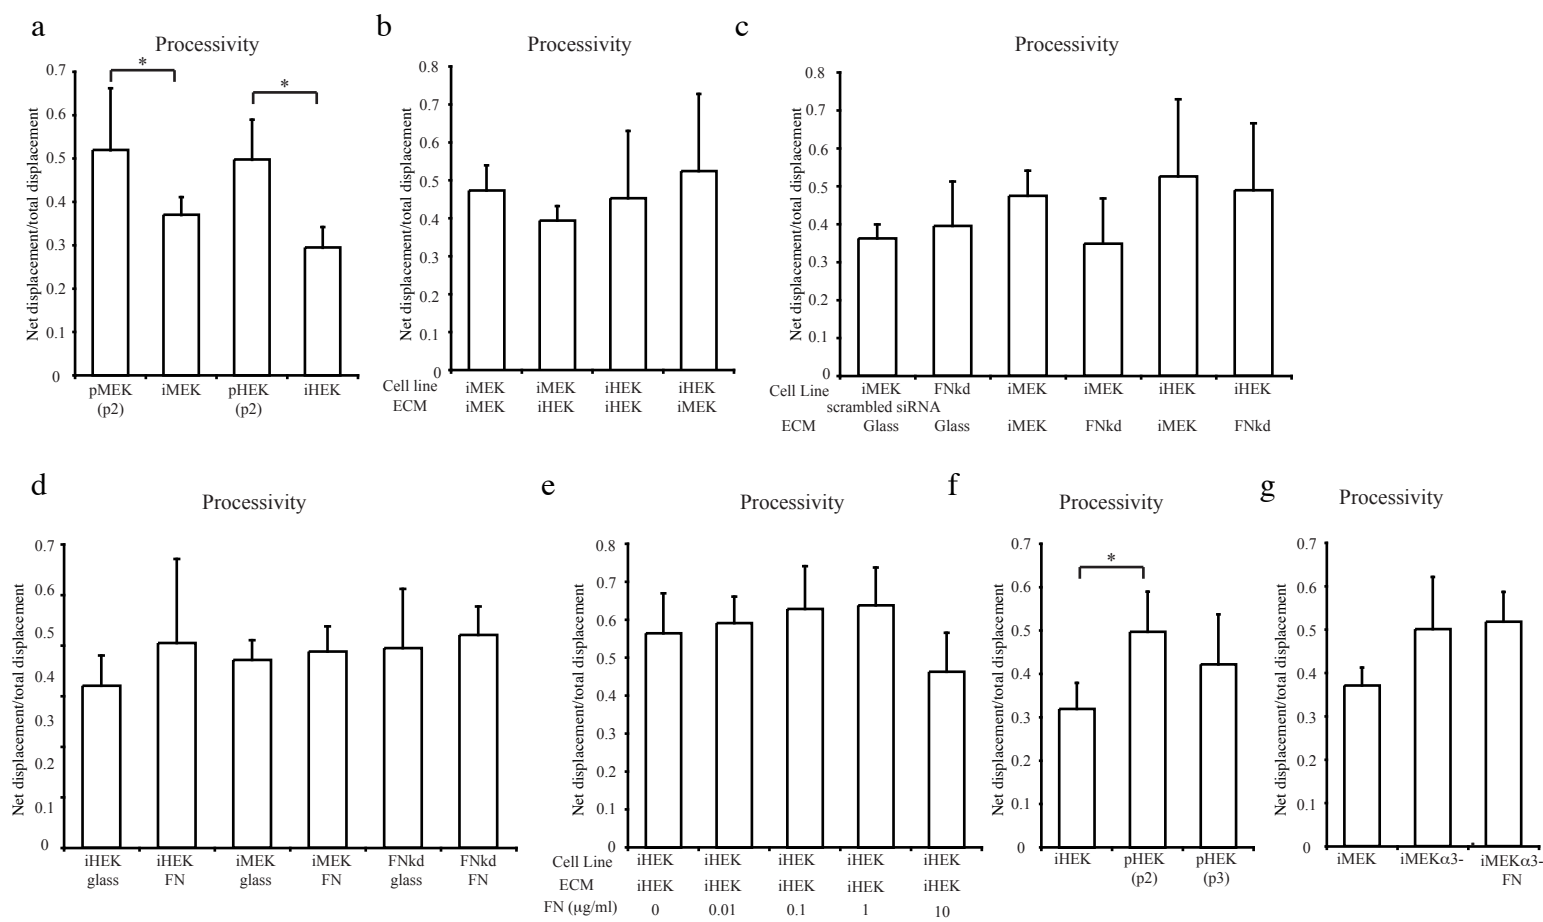

Supplemental Figure 1

**Supplemental Figure 1**

In a-g, the indicated cell lines were either plated overnight onto uncoated glass bottomed dishes, or for 2h onto either FN coated substrates or onto extracellular matrix preparations derived from the indicated cell line. Cells were then imaged every 2 mins over 1 hour and individual cells tracked. For each assay the ratio of net displacement to total distance traveled was calculated and plotted as mean + SD from 3 assays, >30 cells tracked per assay. Asterisks denote significant differences between bracketed columns.

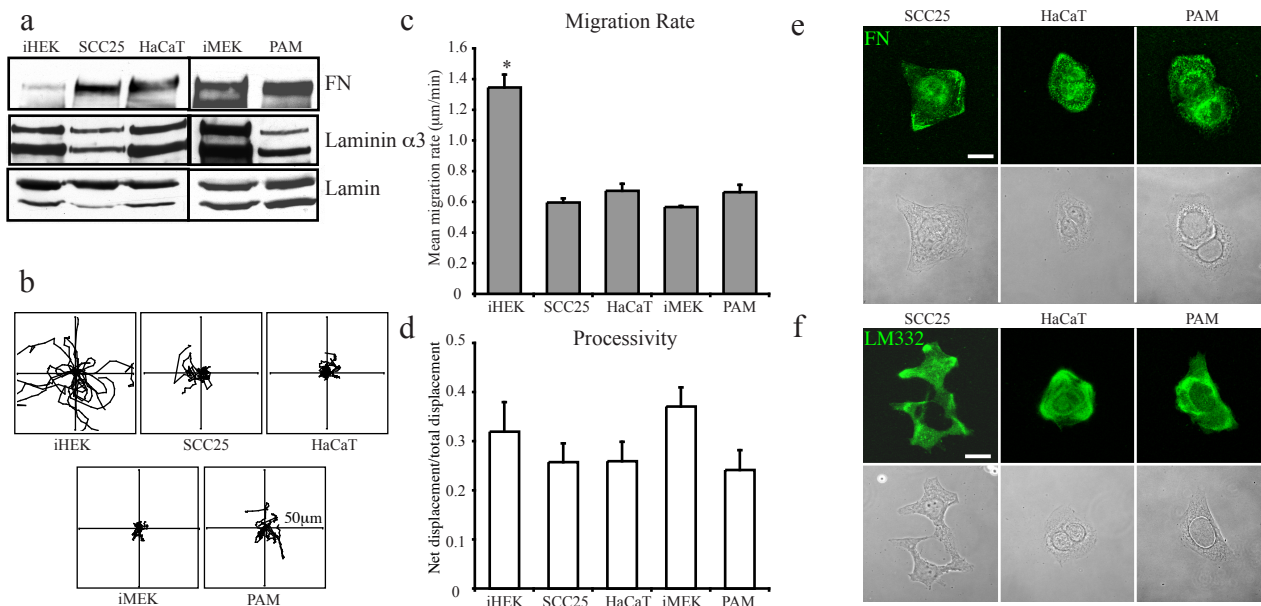

Supplemental Figure 2

**Supplemental Figure 2**

In a, total cell lysates from iHEK, SCC25 and HaCaT or iMEK and PAM were immunoblotted with antibodies against laminin A/C or FN as indicated. In b, c and d iHEK, SCC25, HaCaT, iMEK or PAM cells were plated overnight on glass bottomed dishes then imaged every 2 mins over 1h. In b representative vector diagrams of 10 cells for each cell type are displayed with each line representing the path of one cell relative to its start position. Graphs in c and d represent mean + SD from 3 assays per line with >30 cells tracked per assay. Total migration rates (c) or processivity (d) are shown. Asterisk denotes significant difference from other columns  $p < 0.01$ . In e and f, SCC25, HaCaT or PAM cells were plated overnight onto glass coverslips then fixed and imaged by confocal microscopy following staining with antibodies against FN (e) or LM332 (f). Phase contrast images of the cells are displayed in the lower panels. Bar, 10  $\mu\text{m}$
